# Supplementary material for: A (pentafluoroethyl)(trifluoromethyl)carbene complex of iridium and reductive activation of its sp3 α, β, and γ carbon–fluorine bonds to give perfluoro-2-butyne, perfluoro-1,2,3-butatriene and perfluoro-1-irida-2-methyl-2-cyclobutene) complexes
Source: Royal Society of Chemistry journal article supplement (doi:10.1039/c5dt02075a), 2015-01-01
Supplement: c5dt02075a1.pdf [file c5dt02075a1.pdf]

**SUPPORTING INFORMATION TO ACCOMPANY:**

**A (Pentafluoroethyl)(trifluoromethyl)carbene Complex of Iridium and Reductive Activation of its  $sp^3$   $\alpha$ ,  $\beta$ , and  $\gamma$  Carbon-Fluorine Bonds to Give Perfluoro-2-butyne, Perfluoro-1,2,3-butatriene and Perfluoro-1-irida-2-methyl-2-cyclobutene) Complexes.**

Jian Yuan, Russell P. Hughes, Arnold L. Rheingold

Department of Chemistry, 6128 Burke Laboratory, Dartmouth College, Hanover, New Hampshire 03755, and Department of Chemistry, University of California, San Diego, California 92093-0358

**DFT Calculation Details.**

Full-molecule calculations were carried out using the hybrid B3LYP-D3 functional<sup>1</sup> with the zero-damping, two-body only D3 correction of Grimme et al.,<sup>2</sup> and the 6-311G\*\*++ basis,<sup>3</sup> as implemented in the Jaguar<sup>4</sup> suite of programs. Computed structures were confirmed as energy minima by calculating the vibrational frequencies using second derivative analytic methods, and confirming the absence of imaginary frequencies. Thermodynamic quantities were calculated assuming an ideal gas, and are zero point energy corrected.

**Material Relevant to all DFT output**

Jaguar version 7.9, release 23

Copyright Schrodinger, LLC

All Rights Reserved.

Use of this program should be acknowledged in publications as:

Jaguar, version 7.9, Schrodinger, LLC, New York, NY, 2011.

Non-default options chosen:

SCF calculation type: DFT(b3lyp-d3)

DFT=Becke\_3\_Parameter/HF+Slater+Becke88+VWN+LYP (B3LYP)

Vibrational frequencies and related properties will be computed from analytic second derivatives

Molecular symmetry not used

Energy convergence criterion: 1.00E-05 hartrees

RMS density matrix convergence criterion: 1.00E-06

Highest accuracy cutoffs used in SCF

Coordinates.

Compound 7.

Ir\_CPSTAR\_CO\_bis\_CF3\_CARBE

|    |          |          |          |
|----|----------|----------|----------|
| C  | -0.07340 | 0.30880  | 0.00520  |
| Ir | -1.93670 | 0.76270  | 0.07750  |
| C  | 0.55840  | -1.06140 | -0.10430 |
| F  | 1.51290  | -1.10130 | -1.07380 |
| F  | 1.16420  | -1.43770 | 1.05420  |
| F  | -0.31280 | -2.04910 | -0.40540 |
| C  | 0.98930  | 1.38830  | -0.00150 |
| F  | 2.19690  | 1.00240  | 0.46540  |
| F  | 0.62780  | 2.45780  | 0.76030  |
| F  | 1.20310  | 1.88260  | -1.25590 |
| C  | -4.06790 | 1.61630  | -0.12010 |
| C  | -3.22860 | 2.16930  | -1.14020 |
| C  | -2.21170 | 2.98030  | -0.49090 |
| C  | -2.41670 | 2.88970  | 0.91800  |
| C  | -3.53860 | 2.01090  | 1.15340  |
| O  | -3.12000 | -1.99440 | 0.20040  |
| C  | -2.54730 | -1.00000 | 0.14770  |
| C  | -1.25820 | 3.87960  | -1.21600 |
| H  | -0.43140 | 4.18560  | -0.57960 |
| H  | -0.83280 | 3.38410  | -2.08830 |
| H  | -1.78480 | 4.77780  | -1.55630 |
| C  | -3.45180 | 2.08780  | -2.61810 |
| H  | -2.50670 | 2.11200  | -3.16100 |
| H  | -3.97220 | 1.17010  | -2.89280 |
| H  | -4.05860 | 2.93540  | -2.95690 |
| C  | -1.70660 | 3.64590  | 1.99620  |
| H  | -1.37630 | 2.98190  | 2.79620  |
| H  | -0.83310 | 4.16880  | 1.61520  |
| H  | -2.38960 | 4.38350  | 2.43130  |
| C  | -5.29920 | 0.79040  | -0.34450 |
| H  | -5.46860 | 0.09030  | 0.47420  |
| H  | -6.17830 | 1.43860  | -0.41890 |
| H  | -5.23090 | 0.21150  | -1.26600 |
| C  | -4.13260 | 1.71960  | 2.49690  |
| H  | -3.35810 | 1.64800  | 3.26120  |
| H  | -4.82400 | 2.51800  | 2.79010  |
| H  | -4.68740 | 0.78110  | 2.49410  |

Compound 10a

Ir\_CPSTAR\_CO\_C\_CF3\_C2F5\_CARBE

|    |          |          |          |
|----|----------|----------|----------|
| C  | -0.06260 | 0.38770  | -0.02410 |
| Ir | -1.94000 | 0.80540  | 0.04580  |
| C  | 0.98780  | 1.47940  | -0.06840 |
| F  | 2.17650  | 1.16670  | 0.49250  |
| F  | 1.25630  | 1.85970  | -1.35210 |
| F  | 0.57960  | 2.60900  | 0.57280  |
| C  | 0.53620  | -1.00200 | -0.10080 |
| F  | 1.73990  | -1.02290 | -0.75360 |
| F  | -0.26690 | -1.87610 | -0.78800 |
| C  | 0.76600  | -1.67520 | 1.29380  |
| F  | -0.41380 | -1.97230 | 1.86810  |

|   |          |          |          |
|---|----------|----------|----------|
| F | 1.46200  | -2.81410 | 1.16580  |
| F | 1.43550  | -0.86180 | 2.12260  |
| C | -4.09120 | 1.60320  | -0.12700 |
| C | -3.27890 | 2.17660  | -1.15860 |
| C | -2.27620 | 3.01560  | -0.52420 |
| C | -2.45700 | 2.91810  | 0.88720  |
| C | -3.55420 | 2.01050  | 1.13890  |
| O | -3.06930 | -1.97620 | 0.12930  |
| C | -2.51880 | -0.96960 | 0.09240  |
| C | -1.36030 | 3.93700  | -1.27020 |
| H | -0.57690 | 4.33320  | -0.62950 |
| H | -0.87590 | 3.42590  | -2.10280 |
| H | -1.93540 | 4.77650  | -1.67500 |
| C | -3.51340 | 2.08480  | -2.63400 |
| H | -2.57400 | 2.13780  | -3.18460 |
| H | -4.00640 | 1.15030  | -2.90200 |
| H | -4.14980 | 2.91200  | -2.96900 |
| C | -1.74900 | 3.68670  | 1.95800  |
| H | -1.40700 | 3.02880  | 2.75820  |
| H | -0.88380 | 4.21860  | 1.57130  |
| H | -2.43820 | 4.41710  | 2.39550  |
| C | -5.30250 | 0.74420  | -0.33550 |
| H | -5.44380 | 0.04170  | 0.48640  |
| H | -6.19900 | 1.36870  | -0.40170 |
| H | -5.22850 | 0.16470  | -1.25630 |
| C | -4.11950 | 1.70140  | 2.49080  |
| H | -3.33180 | 1.64940  | 3.24310  |
| H | -4.82820 | 2.47960  | 2.79600  |
| H | -4.64740 | 0.74750  | 2.49460  |

Compound 10b

Ir\_CPSTAR\_CO\_C\_CF3\_C2F5\_CARBE ISOMER

|    |          |          |          |
|----|----------|----------|----------|
| C  | -0.04050 | 0.39900  | 0.02970  |
| Ir | -1.91790 | 0.83840  | 0.05380  |
| C  | 0.45740  | -1.03750 | -0.03930 |
| F  | 1.79810  | -1.19060 | -0.06960 |
| F  | 0.02150  | -1.76670 | 1.02520  |
| F  | -0.01240 | -1.67910 | -1.14710 |
| C  | 1.05010  | 1.44160  | 0.03570  |
| F  | 2.09290  | 1.14200  | 0.87050  |
| F  | 0.57060  | 2.65300  | 0.47860  |
| C  | 1.67120  | 1.76010  | -1.36440 |
| F  | 0.71000  | 2.18230  | -2.21050 |
| F  | 2.58660  | 2.73770  | -1.26550 |
| F  | 2.25520  | 0.68850  | -1.90710 |
| C  | -4.08690 | 1.60090  | -0.05710 |
| C  | -3.31820 | 2.21840  | -1.09700 |
| C  | -2.32880 | 3.07540  | -0.47050 |
| C  | -2.45410 | 2.92880  | 0.94030  |
| C  | -3.52320 | 1.98860  | 1.20250  |
| O  | -2.97810 | -1.96930 | -0.03890 |
| C  | -2.46510 | -0.94310 | -0.00350 |
| C  | -1.49830 | 4.08200  | -1.20210 |

|   |          |         |          |
|---|----------|---------|----------|
| H | -0.60870 | 4.36070 | -0.64300 |
| H | -1.17840 | 3.70680 | -2.17230 |
| H | -2.09600 | 4.98520 | -1.36920 |
| C | -3.59070 | 2.15260 | -2.56750 |
| H | -2.66480 | 2.20470 | -3.14090 |
| H | -4.09890 | 1.22690 | -2.83750 |
| H | -4.22740 | 2.99030 | -2.87450 |
| C | -1.73250 | 3.69700 | 2.00240  |
| H | -1.40190 | 3.04260 | 2.81000  |
| H | -0.85790 | 4.20770 | 1.60780  |
| H | -2.40680 | 4.44600 | 2.43230  |
| C | -5.28740 | 0.72410 | -0.25360 |
| H | -5.39910 | 0.00540 | 0.55870  |
| H | -6.19480 | 1.33540 | -0.28820 |
| H | -5.22620 | 0.16250 | -1.18630 |
| C | -4.04670 | 1.64020 | 2.56130  |
| H | -3.23750 | 1.57710 | 3.28950  |
| H | -4.75250 | 2.40490 | 2.90520  |
| H | -4.56650 | 0.68190 | 2.55620  |

#### Compound 11

Ir\_CPSTAR\_CO\_CF3CCCF3\_ALKYNE

|    |          |          |          |
|----|----------|----------|----------|
| Ir | -1.88980 | 0.84750  | -0.36430 |
| C  | -3.99830 | 1.55730  | 0.03240  |
| C  | -3.40610 | 2.46650  | -0.94240 |
| C  | -2.32120 | 3.13900  | -0.30870 |
| C  | -2.20360 | 2.62800  | 1.03440  |
| C  | -3.27480 | 1.68470  | 1.25900  |
| O  | -2.28670 | -1.47690 | -2.23800 |
| C  | -2.11210 | -0.59100 | -1.52310 |
| C  | -1.47300 | 4.21540  | -0.91260 |
| H  | -0.45760 | 4.19250  | -0.51880 |
| H  | -1.40870 | 4.11060  | -1.99580 |
| H  | -1.90140 | 5.19920  | -0.69150 |
| C  | -3.94030 | 2.73790  | -2.31620 |
| H  | -3.15080 | 3.07350  | -2.98900 |
| H  | -4.38830 | 1.84410  | -2.75140 |
| H  | -4.71030 | 3.51650  | -2.28180 |
| C  | -1.20910 | 3.08240  | 2.06010  |
| H  | -0.98890 | 2.28780  | 2.77360  |
| H  | -0.26770 | 3.37710  | 1.59390  |
| H  | -1.59220 | 3.94360  | 2.61730  |
| C  | -5.24280 | 0.74920  | -0.18260 |
| H  | -5.26080 | -0.12790 | 0.46450  |
| H  | -6.13120 | 1.35140  | 0.03530  |
| H  | -5.31780 | 0.40290  | -1.21390 |
| C  | -3.59800 | 1.02300  | 2.56360  |
| H  | -2.69350 | 0.79790  | 3.12820  |
| H  | -4.22790 | 1.67810  | 3.17580  |
| H  | -4.13350 | 0.08590  | 2.41090  |
| C  | -0.22960 | 0.00300  | 0.57430  |
| C  | 0.19950  | 0.71030  | -0.39900 |
| C  | 1.36420  | 1.21030  | -1.13860 |
| F  | 2.53250  | 0.68690  | -0.70910 |
| F  | 1.25340  | 0.93750  | -2.45800 |

|   |          |          |          |
|---|----------|----------|----------|
| F | 1.46630  | 2.56450  | -1.02140 |
| C | 0.08650  | -0.85620 | 1.72070  |
| F | -0.39670 | -0.31370 | 2.87610  |
| F | -0.49140 | -2.07100 | 1.58710  |
| F | 1.41040  | -1.04860 | 1.89820  |

#### Compound 13

Ir\_CPSTAR\_CO\_CF3CCCF2\_METALLACYCYLOBU  
TENE

|    |          |           |         |
|----|----------|-----------|---------|
| C  | 7.82000  | -16.18900 | 2.47700 |
| Ir | 7.25730  | -14.21870 | 2.96320 |
| C  | 9.34280  | -14.56280 | 2.70920 |
| C  | 9.13540  | -16.01200 | 2.41940 |
| F  | 10.00420 | -13.88290 | 1.71550 |
| F  | 10.10670 | -14.35660 | 3.84830 |
| F  | 10.13050 | -16.87690 | 2.16290 |
| C  | 7.04380  | -17.43800 | 2.29090 |
| F  | 7.65860  | -18.34110 | 1.49710 |
| F  | 6.81410  | -18.06350 | 3.48560 |
| F  | 5.82300  | -17.19880 | 1.75070 |
| C  | 6.27550  | -12.45410 | 4.05020 |
| C  | 7.32820  | -12.95840 | 4.87330 |
| C  | 7.01860  | -14.33050 | 5.20500 |
| C  | 5.71600  | -14.63360 | 4.64450 |
| C  | 5.26860  | -13.49640 | 3.91800 |
| O  | 6.89370  | -13.43380 | 0.06900 |
| C  | 7.06190  | -13.75530 | 1.15720 |
| C  | 8.50920  | -12.18460 | 5.36940 |
| H  | 9.37430  | -12.83000 | 5.50650 |
| H  | 8.79020  | -11.39470 | 4.67270 |
| H  | 8.26770  | -11.72070 | 6.33190 |
| C  | 7.81590  | -15.21910 | 6.11170 |
| H  | 7.65010  | -16.27030 | 5.87310 |
| H  | 8.88280  | -15.02360 | 6.00550 |
| H  | 7.53800  | -15.05970 | 7.15880 |
| C  | 4.94030  | -15.89440 | 4.86280 |
| H  | 4.32820  | -16.14370 | 3.99600 |
| H  | 5.59540  | -16.74030 | 5.05830 |
| H  | 4.27640  | -15.77080 | 5.72530 |
| C  | 3.94540  | -13.34790 | 3.23060 |
| H  | 3.57330  | -14.30880 | 2.87480 |
| H  | 3.20240  | -12.93200 | 3.92000 |
| H  | 4.01370  | -12.67790 | 2.37280 |
| C  | 6.14220  | -11.05130 | 3.53980 |
| H  | 5.60450  | -11.02170 | 2.59150 |
| H  | 5.58750  | -10.43780 | 4.25800 |
| H  | 7.11750  | -10.59010 | 3.38470 |

#### Compound 17

Ir\_CPSTAR\_CO\_CF2CCCF2\_BUTATRIENE

|   |         |          |          |
|---|---------|----------|----------|
| C | 6.47310 | 1.49020  | -1.21310 |
| O | 4.64840 | -2.28180 | 0.93150  |
| C | 7.81750 | 1.53790  | -0.68590 |
| C | 5.48680 | -1.54990 | 0.63660  |
| C | 5.57810 | 1.58620  | -0.09650 |

|    |          |          |          |
|----|----------|----------|----------|
| Ir | 6.79120  | -0.30810 | 0.15510  |
| C  | 7.74040  | 1.72750  | 0.74090  |
| C  | 6.36530  | 1.74830  | 1.11680  |
| C  | 8.36500  | -1.57750 | 0.59360  |
| C  | 8.01630  | -1.71070 | -0.74140 |
| C  | 9.21350  | -1.88300 | 1.54480  |
| F  | 9.17060  | -1.39180 | 2.78840  |
| F  | 10.25420 | -2.71540 | 1.43560  |
| C  | 8.31780  | -2.22070 | -1.91060 |
| F  | 9.32450  | -3.06140 | -2.16960 |
| F  | 7.65690  | -1.96190 | -3.04540 |
| C  | 9.08010  | 1.49300  | -1.49200 |
| H  | 9.87810  | 0.98720  | -0.94640 |
| H  | 8.92960  | 0.95390  | -2.42730 |
| H  | 9.42240  | 2.50490  | -1.73180 |
| C  | 6.10040  | 1.44050  | -2.66320 |
| H  | 6.13090  | 2.44400  | -3.10250 |
| H  | 6.78310  | 0.80190  | -3.22430 |
| H  | 5.09440  | 1.04310  | -2.79920 |
| C  | 4.08290  | 1.67830  | -0.16900 |
| H  | 3.61370  | 1.25980  | 0.72200  |
| H  | 3.77450  | 2.72620  | -0.24940 |
| H  | 3.69220  | 1.14370  | -1.03470 |
| C  | 5.82400  | 2.02600  | 2.48620  |
| H  | 6.48420  | 1.63450  | 3.26070  |
| H  | 5.71930  | 3.10550  | 2.64490  |
| H  | 4.84250  | 1.57240  | 2.62650  |
| C  | 8.90860  | 1.88890  | 1.66380  |
| H  | 8.67530  | 1.52980  | 2.66580  |
| H  | 9.77450  | 1.33120  | 1.30670  |
| H  | 9.19220  | 2.94460  | 1.73400  |

IrCpSTAR\_CO\_I\_CF2CF3 (Figure 4A)

|    |          |          |          |
|----|----------|----------|----------|
| Ir | 0.11210  | -0.46780 | 0.37360  |
| C  | 0.73720  | 1.17170  | 1.88410  |
| C  | -0.62250 | 1.47530  | 1.43240  |
| C  | -0.57310 | 1.72100  | 0.03850  |
| C  | 0.80300  | 1.54470  | -0.40960 |
| C  | 1.60710  | 1.27740  | 0.76480  |
| C  | 1.55380  | -1.97620 | 0.06530  |
| F  | 2.55380  | -1.89650 | 1.02010  |
| F  | 1.05890  | -3.25430 | 0.14720  |
| C  | 2.30850  | -1.97610 | -1.29480 |
| F  | 3.20020  | -2.97500 | -1.36960 |
| F  | 1.45130  | -2.11460 | -2.32340 |
| F  | 2.98880  | -0.82270 | -1.48710 |
| C  | -1.71220 | 2.16560  | -0.82960 |
| H  | -1.61910 | 1.78650  | -1.84790 |
| H  | -2.67360 | 1.83780  | -0.43440 |
| H  | -1.73060 | 3.25960  | -0.88670 |
| C  | -1.80550 | 1.64160  | 2.33330  |
| H  | -2.74420 | 1.57340  | 1.78320  |
| H  | -1.82190 | 0.87870  | 3.11150  |
| H  | -1.76750 | 2.62490  | 2.81610  |
| C  | 1.31390  | 1.91110  | -1.77070 |

|   |          |          |          |
|---|----------|----------|----------|
| H | 2.23490  | 1.38430  | -2.01090 |
| H | 0.58500  | 1.67760  | -2.54760 |
| H | 1.51550  | 2.98770  | -1.81800 |
| C | 3.10270  | 1.23540  | 0.82850  |
| H | 3.54780  | 1.09000  | -0.15250 |
| H | 3.46890  | 2.18630  | 1.23130  |
| H | 3.45520  | 0.43550  | 1.47870  |
| C | 1.14480  | 0.98580  | 3.31280  |
| H | 2.13000  | 0.52590  | 3.38840  |
| H | 1.18260  | 1.95630  | 3.82080  |
| H | 0.43850  | 0.34870  | 3.84640  |
| I | -1.03860 | -2.04630 | 2.33900  |
| O | -1.68850 | -1.70120 | -1.70870 |
| C | -0.97660 | -1.27780 | -0.91970 |

IrCpSTAR\_CO\_I\_CF2CF3\_ANION\_DOUBLET (Figure 4B)

|    |          |          |          |
|----|----------|----------|----------|
| Ir | 0.14420  | -0.43610 | 0.21630  |
| C  | 0.71610  | 1.26410  | 1.79490  |
| C  | -0.61410 | 1.50720  | 1.30850  |
| C  | -0.51850 | 1.79780  | -0.09680 |
| C  | 0.86230  | 1.74300  | -0.48350 |
| C  | 1.61580  | 1.37120  | 0.68480  |
| C  | 1.54480  | -1.94460 | -0.10010 |
| F  | 2.62800  | -1.84260 | 0.78530  |
| F  | 1.08360  | -3.23970 | 0.05670  |
| C  | 2.23450  | -1.98680 | -1.49230 |
| F  | 3.15520  | -2.97770 | -1.58830 |
| F  | 1.34870  | -2.18610 | -2.48750 |
| F  | 2.89410  | -0.83410 | -1.76510 |
| C  | -1.65190 | 2.21340  | -0.99010 |
| H  | -1.48030 | 1.89710  | -2.02050 |
| H  | -2.59890 | 1.78010  | -0.66480 |
| H  | -1.76830 | 3.30460  | -0.99140 |
| C  | -1.84260 | 1.59950  | 2.16390  |
| H  | -2.75350 | 1.53170  | 1.56580  |
| H  | -1.86850 | 0.78330  | 2.88790  |
| H  | -1.86790 | 2.55410  | 2.70640  |
| C  | 1.41900  | 2.12480  | -1.82220 |
| H  | 2.34780  | 1.59570  | -2.03620 |
| H  | 0.71910  | 1.89170  | -2.62790 |
| H  | 1.62920  | 3.20260  | -1.87050 |
| C  | 3.11270  | 1.30320  | 0.77540  |
| H  | 3.56060  | 1.04840  | -0.18480 |
| H  | 3.51980  | 2.27120  | 1.09430  |
| H  | 3.43340  | 0.54850  | 1.49360  |
| C  | 1.09130  | 1.04400  | 3.22830  |
| H  | 2.05140  | 0.53290  | 3.31310  |
| H  | 1.16900  | 2.00270  | 3.75980  |
| H  | 0.34830  | 0.42220  | 3.72830  |
| I  | -1.03400 | -2.14660 | 2.81270  |
| O  | -1.93170 | -1.89140 | -1.38910 |
| C  | -1.12110 | -1.37500 | -0.74410 |

**Ir\_CPSTAR\_CO\_I\_C2F5\_DIANION\_SINGLET  
(Figure 5A)**

|    |           |          |          |
|----|-----------|----------|----------|
| Ir | 4.30980   | -4.66430 | -5.15790 |
| C  | 4.73210   | -3.52490 | -3.11320 |
| C  | 3.37800   | -3.28270 | -3.46210 |
| C  | 3.36590   | -2.58390 | -4.72660 |
| C  | 4.72760   | -2.32010 | -5.11130 |
| C  | 5.56830   | -2.94510 | -4.14810 |
| C  | 5.70970   | -6.15710 | -5.20590 |
| F  | 6.62120   | -6.07140 | -4.11390 |
| F  | 5.25030   | -7.48370 | -5.12940 |
| C  | 6.67080   | -6.19690 | -6.42530 |
| F  | 7.62410   | -7.16970 | -6.32840 |
| F  | 6.01390   | -6.42850 | -7.57770 |
| F  | 7.34610   | -5.03110 | -6.56610 |
| C  | 2.14500   | -2.04270 | -5.41410 |
| H  | 2.29590   | -1.98200 | -6.49420 |
| H  | 1.27800   | -2.68510 | -5.24540 |
| H  | 1.89060   | -1.03630 | -5.05360 |
| C  | 2.17120   | -3.62600 | -2.64040 |
| H  | 1.30740   | -3.83770 | -3.27380 |
| H  | 2.34950   | -4.51290 | -2.02930 |
| H  | 1.89580   | -2.80140 | -1.96660 |
| C  | 5.17250   | -1.49820 | -6.28310 |
| H  | 6.14290   | -1.83430 | -6.65370 |
| H  | 4.46530   | -1.57520 | -7.11180 |
| H  | 5.26290   | -0.43360 | -6.01970 |
| C  | 7.06720   | -2.88900 | -4.10620 |
| H  | 7.48630   | -2.76440 | -5.10590 |
| H  | 7.41440   | -2.05400 | -3.48220 |
| H  | 7.47930   | -3.81280 | -3.69880 |
| C  | 5.23790   | -4.16900 | -1.85680 |
| H  | 6.11170   | -4.78800 | -2.06390 |
| H  | 5.52030   | -3.41860 | -1.10420 |
| H  | 4.47960   | -4.81810 | -1.41350 |
| I  | -17.15250 | 14.24730 | 22.23290 |
| O  | 2.57270   | -6.19290 | -7.05630 |
| C  | 3.26580   | -5.60870 | -6.31050 |

**Ir(CpSTAR)(CO)\_CF2CF3\_K (Figure 5B)**

|    |          |          |          |
|----|----------|----------|----------|
| IR | -0.24480 | -0.78950 | 0.65580  |
| C  | -0.74180 | 1.10130  | -0.63860 |
| C  | -1.00900 | -0.05090 | -1.43530 |
| C  | 0.23490  | -0.76230 | -1.60370 |
| C  | 1.28870  | 0.01910  | -0.99540 |
| C  | 0.68870  | 1.14510  | -0.37720 |
| C  | -0.51410 | -0.08260 | 2.57390  |
| F  | -0.87230 | 1.26300  | 2.60800  |
| F  | -1.59650 | -0.69810 | 3.34900  |
| C  | 0.65660  | -0.17450 | 3.58790  |
| F  | 0.35970  | 0.39330  | 4.77990  |
| F  | 0.99700  | -1.45190 | 3.83480  |
| F  | 1.74520  | 0.46350  | 3.11420  |
| C  | 0.44300  | -1.96390 | -2.48260 |
| H  | 1.27340  | -2.57930 | -2.13190 |

|   |          |          |          |
|---|----------|----------|----------|
| H | -0.44420 | -2.59950 | -2.51360 |
| H | 0.66830  | -1.66120 | -3.51270 |
| C | -2.30550 | -0.37540 | -2.11860 |
| H | -2.43960 | -1.45160 | -2.24700 |
| H | -3.16220 | 0.01000  | -1.56120 |
| H | -2.34160 | 0.07600  | -3.11910 |
| C | 2.75570  | -0.28740 | -1.05940 |
| H | 3.28490  | 0.10590  | -0.19010 |
| H | 2.94050  | -1.36230 | -1.09700 |
| H | 3.20970  | 0.15700  | -1.95450 |
| C | 1.40510  | 2.27470  | 0.30320  |
| H | 2.36050  | 1.95210  | 0.71870  |
| H | 1.60580  | 3.08680  | -0.40660 |
| H | 0.81510  | 2.68890  | 1.12170  |
| C | -1.70590 | 2.20970  | -0.32760 |
| H | -1.49150 | 2.66580  | 0.63850  |
| H | -1.65230 | 2.99760  | -1.08970 |
| H | -2.73710 | 1.85110  | -0.29860 |
| K | -3.05340 | -2.21920 | 1.87110  |
| O | -0.26580 | -3.62150 | 1.62870  |
| C | -0.19190 | -2.50810 | 1.24850  |

**Ir\_CpSTAR\_CO\_CF2CF3\_Na (Figure 5C)**

|    |          |          |          |
|----|----------|----------|----------|
| Ir | 0.15640  | -0.31540 | 0.22620  |
| C  | 0.77210  | 1.18010  | 1.90000  |
| C  | -0.58660 | 1.46240  | 1.55490  |
| C  | -0.60950 | 1.86750  | 0.17190  |
| C  | 0.75450  | 1.93580  | -0.30360 |
| C  | 1.60040  | 1.48830  | 0.74500  |
| C  | 1.42970  | -1.90150 | 0.54460  |
| F  | 2.35910  | -1.65480 | 1.54450  |
| F  | 0.78600  | -3.14980 | 1.04450  |
| C  | 2.27920  | -2.47190 | -0.62080 |
| F  | 3.10420  | -3.46360 | -0.22230 |
| F  | 1.50460  | -2.96780 | -1.60080 |
| F  | 3.05550  | -1.50500 | -1.14950 |
| C  | -1.81310 | 2.37660  | -0.57030 |
| H  | -1.72780 | 2.20190  | -1.64410 |
| H  | -2.73080 | 1.89290  | -0.23120 |
| H  | -1.93310 | 3.45650  | -0.42030 |
| C  | -1.75050 | 1.52490  | 2.50170  |
| H  | -2.69110 | 1.27080  | 2.00990  |
| H  | -1.61960 | 0.85260  | 3.35200  |
| H  | -1.85980 | 2.53960  | 2.90660  |
| C  | 1.19090  | 2.44900  | -1.64370 |
| H  | 2.12640  | 1.98860  | -1.96440 |
| H  | 0.44460  | 2.24900  | -2.41420 |
| H  | 1.34800  | 3.53450  | -1.61120 |
| C  | 3.10050  | 1.47170  | 0.73200  |
| H  | 3.49220  | 1.36720  | -0.28040 |
| H  | 3.49730  | 2.40510  | 1.14970  |
| H  | 3.49720  | 0.64780  | 1.32570  |
| C  | 1.29650  | 0.87780  | 3.27490  |
| H  | 2.15950  | 0.21340  | 3.23630  |
| H  | 1.60600  | 1.79950  | 3.78330  |

|    |          |          |          |
|----|----------|----------|----------|
| H  | 0.53950  | 0.39860  | 3.89920  |
| Na | -1.20720 | -2.37710 | 1.55810  |
| O  | -1.42040 | -1.73530 | -1.90040 |
| C  | -0.79060 | -1.21220 | -1.06960 |

**Ir\_CpSTAR\_CO\_CF2CF3\_MgI (Figure 5D)**

|    |          |          |          |
|----|----------|----------|----------|
| Ir | 0.84650  | -0.15260 | 0.46460  |
| C  | 1.20630  | 1.19750  | 2.27290  |
| C  | -0.21680 | 1.23370  | 1.98780  |
| C  | -0.39220 | 1.79840  | 0.68260  |
| C  | 0.91100  | 2.12510  | 0.15290  |
| C  | 1.89400  | 1.77260  | 1.14950  |
| C  | 2.03260  | -1.60260 | 0.74860  |
| F  | 3.05260  | -1.53260 | 1.63580  |
| F  | 0.13080  | -1.98520 | 3.57420  |
| C  | 1.97980  | -3.04030 | 0.23070  |
| F  | 3.06160  | -3.76110 | 0.50020  |
| F  | 0.90800  | -3.68230 | 0.86630  |
| F  | 1.72650  | -3.11830 | -1.07790 |
| C  | -1.71120 | 2.09060  | 0.02940  |
| H  | -1.63020 | 2.10400  | -1.05810 |
| H  | -2.46430 | 1.34940  | 0.29880  |
| H  | -2.07770 | 3.07270  | 0.34670  |
| C  | -1.29980 | 0.90820  | 2.97170  |
| H  | -2.21640 | 0.58080  | 2.47870  |
| H  | -0.98350 | 0.13020  | 3.66830  |
| H  | -1.54030 | 1.80540  | 3.55420  |
| C  | 1.18670  | 2.84910  | -1.13100 |
| H  | 2.15190  | 2.56690  | -1.55290 |
| H  | 0.42190  | 2.64540  | -1.88090 |
| H  | 1.20120  | 3.93120  | -0.95860 |
| C  | 3.36680  | 2.03210  | 1.05920  |
| H  | 3.71510  | 2.02360  | 0.02600  |
| H  | 3.59780  | 3.01630  | 1.48200  |
| H  | 3.93890  | 1.28950  | 1.61550  |
| C  | 1.80740  | 0.76580  | 3.57760  |
| H  | 2.87710  | 0.58160  | 3.48180  |
| H  | 1.66720  | 1.55310  | 4.32650  |
| H  | 1.33590  | -0.15080 | 3.93870  |
| O  | -0.50430 | -1.20060 | -2.03190 |
| C  | 0.01920  | -0.87700 | -1.06750 |
| I  | -2.97670 | -2.71600 | 0.98120  |
| Mg | -0.57610 | -2.17950 | 1.90830  |

**Ir\_CPSTAR\_CO\_bis\_CF3\_CARBENE\_PLUS\_Mg (Figure 6A)**

|    |          |          |          |
|----|----------|----------|----------|
| C  | 0.19700  | 0.59850  | -0.02710 |
| Ir | -1.91060 | 0.71930  | 0.10650  |
| C  | 0.86380  | 0.00400  | -1.00040 |
| F  | 2.15210  | -0.10510 | -1.25580 |
| F  | 0.22300  | -0.68340 | -2.03060 |
| F  | -2.63370 | -1.74100 | -3.25780 |
| C  | 1.03760  | 1.27540  | 1.03000  |
| F  | 2.28020  | 0.76160  | 1.18290  |
| F  | 0.46130  | 1.22520  | 2.24950  |

|    |          |          |          |
|----|----------|----------|----------|
| F  | 1.21160  | 2.60220  | 0.74350  |
| C  | -4.01000 | 1.53270  | -0.24410 |
| C  | -3.19210 | 2.04210  | -1.32070 |
| C  | -2.18140 | 2.87270  | -0.73320 |
| C  | -2.42570 | 2.96760  | 0.69270  |
| C  | -3.54300 | 2.13490  | 0.98900  |
| O  | -1.91280 | -1.72360 | 1.85900  |
| C  | -1.90940 | -0.79300 | 1.17070  |
| C  | -1.16710 | 3.67850  | -1.49080 |
| H  | -0.25370 | 3.81890  | -0.91380 |
| H  | -0.89580 | 3.20200  | -2.43390 |
| H  | -1.57160 | 4.66960  | -1.72540 |
| C  | -3.49360 | 1.91940  | -2.79000 |
| H  | -2.59740 | 2.02750  | -3.40320 |
| H  | -3.96160 | 0.96740  | -3.04800 |
| H  | -4.18750 | 2.71280  | -3.09340 |
| C  | -1.72660 | 3.88730  | 1.64790  |
| H  | -1.72330 | 3.48690  | 2.66260  |
| H  | -0.69060 | 4.05900  | 1.35930  |
| H  | -2.23010 | 4.86130  | 1.67570  |
| C  | -5.28580 | 0.75560  | -0.40660 |
| H  | -5.48850 | 0.12630  | 0.46080  |
| H  | -6.13550 | 1.43820  | -0.52560 |
| H  | -5.25890 | 0.10880  | -1.28500 |
| C  | -4.20400 | 1.98980  | 2.32790  |
| H  | -3.49020 | 2.10770  | 3.14390  |
| H  | -4.97910 | 2.75530  | 2.44990  |
| H  | -4.68310 | 1.01650  | 2.43950  |
| Mg | -1.90300 | -0.88110 | -1.86030 |

**Ir\_CPSTAR\_CO\_CF2CCF3\_PLUS\_MgF (Figure 6B)**

|    |          |          |          |
|----|----------|----------|----------|
| C  | -0.19020 | 0.26620  | 0.46830  |
| Ir | -2.16990 | 0.69700  | -0.14120 |
| C  | 0.96280  | 0.50360  | -0.43590 |
| F  | 1.19930  | 1.81480  | -0.67260 |
| F  | 2.13320  | -0.05850 | -0.13510 |
| F  | 0.68050  | -0.01620 | -1.75240 |
| C  | 0.08270  | -0.12440 | 1.71130  |
| F  | 1.27570  | -0.34250 | 2.26080  |
| F  | -0.83880 | -0.34440 | 2.64110  |
| C  | -4.17410 | 1.77640  | 0.15140  |
| C  | -3.53470 | 2.30740  | -1.02850 |
| C  | -2.31660 | 2.95370  | -0.61080 |
| C  | -2.24340 | 2.84690  | 0.83220  |
| C  | -3.39440 | 2.15650  | 1.30710  |
| O  | -2.85160 | -2.22840 | -0.00850 |
| C  | -2.58490 | -1.10260 | -0.06930 |
| C  | -1.44870 | 3.83890  | -1.46080 |
| H  | -0.40590 | 3.81030  | -1.14470 |
| H  | -1.48390 | 3.55310  | -2.51380 |
| H  | -1.78680 | 4.87990  | -1.39550 |
| C  | -4.14830 | 2.37230  | -2.39870 |
| H  | -3.39830 | 2.42430  | -3.18980 |

|   |          |         |          |    |          |         |          |
|---|----------|---------|----------|----|----------|---------|----------|
| H | -4.77950 | 1.50650 | -2.60090 | H  | -6.30620 | 1.89590 | 0.32910  |
| H | -4.77740 | 3.26640 | -2.48530 | H  | -5.75130 | 0.59660 | -0.72940 |
| C | -1.17540 | 3.46750 | 1.68220  | C  | -3.77830 | 1.92900 | 2.73900  |
| H | -1.07600 | 2.95850 | 2.64170  | H  | -2.90280 | 1.84360 | 3.38360  |
| H | -0.20430 | 3.44680 | 1.18710  | H  | -4.38540 | 2.76240 | 3.11290  |
| H | -1.42020 | 4.51580 | 1.88760  | H  | -4.36430 | 1.01670 | 2.85830  |
| C | -5.53030 | 1.13390 | 0.19320  | Mg | -1.30310 | 0.13250 | -2.46980 |
| H | -5.61560 | 0.42560 | 1.01880  | F  | -1.40080 | 0.08490 | -4.26290 |

## References.

- (a) Becke, A. D., Density-functional thermochemistry. III. The role of exact exchange. *J. Chem. Phys.* **1993**, *98* (7), 5648-52; (b) Becke, A. D., A new mixing of Hartree-Fock and local-density-functional theories. *J. Chem. Phys.* **1993**, *98* (2), 1372-7; (c) Lee, C.; Yang, W.; Parr, R. G., Development of the Colle-Salvetti correlation-energy formula into a functional of the electron density. *Phys. Rev. B* **1988**, *37* (2), 785-9; (d) Stephens, P. J.; Devlin, F. J.; Chabalowski, C. F.; Frisch, M. J., Ab Initio Calculation of Vibrational Absorption and Circular Dichroism Spectra Using Density Functional Force Fields. *J. Phys. Chem.* **1994**, *98* (45), 11623-7.
- (a) Grimme, S.; Antony, J.; Ehrlich, S.; Krieg, H., A consistent and accurate ab initio parametrization of density functional dispersion correction (DFT-D) for the 94 elements H-Pu. *J. Chem. Phys.* **2010**, *132* (15), 154104; (b) Goerigk, L.; Grimme, S., A thorough benchmark of density functional methods for general main group thermochemistry, kinetics, and noncovalent interactions. *Phys. Chem. Chem. Phys.* **2011**, *13* (14), 6670-6688.
- (a) Frisch, M. J.; Pople, J. A.; Binkley, J. S., Self-consistent molecular orbital methods. 25. Supplementary functions for Gaussian basis sets. *J. Chem. Phys.* **1984**, *80* (7), 3265-9; (b) Clark, T.; Chandrasekhar, J.; Spitznagel, G. W.; Schleyer, P. v. R., Efficient diffuse function-augmented basis sets for anion calculations. III. The 3-21 + G basis set for first-row elements, lithium to fluorine. *J. Comput. Chem.* **1983**, *4*, 294-301; (c) McLean, A. D.; Chandler, G. S., Contracted Gaussian basis sets for molecular calculations. I. Second row atoms, Z = 11-18. *J. Chem. Phys.* **1980**, *72*, 5639-48; (d) Krishnan, R.; Binkley, J. S.; Seeger, R.; Pople, J. A., Self-consistent molecular orbital methods. XX. A basis set for correlated wave functions. *J. Chem. Phys.* **1980**, *72* (1), 650-4.
- Jaguar, versions 7.0-7.9*, Schrödinger, LLC, New York, NY: 2007-2012.
